# Supplementary material
Source: JCI journal article supplement (doi:10.1172/jci190283)
Supplement: sd1 [file 1]

## Supplementary Material

### Supplementary Methods:

#### Bulk RNA-seq

Six2.Cre-eGFP-positive cells were isolated from five heterozygous and five knockout (KO) mice at E14.5 after enzymatic digestion. Single cells were FACS-sorted using a BD FACSAriaTMIII cell sorter. RNA was extracted using the phenol/chloroform-method and sequenced using the Illumina HiSeq2000 platform with 125-bp paired-end reads. Low-quality reads were identified using FastQC and removed with Trimmomatic<sup>1</sup>. High-quality reads were aligned to the mouse reference genome (mm9) using the STAR aligner<sup>2</sup>, and gene-level counts were quantified. Differential gene expression between KO and heterozygous samples was analyzed using the DESeq2 pipeline<sup>3</sup>. Genes with an adjusted *P*-value (Benjamini–Hochberg correction) below 0.05 were considered significantly differentially expressed.

### Supplementary Figures:

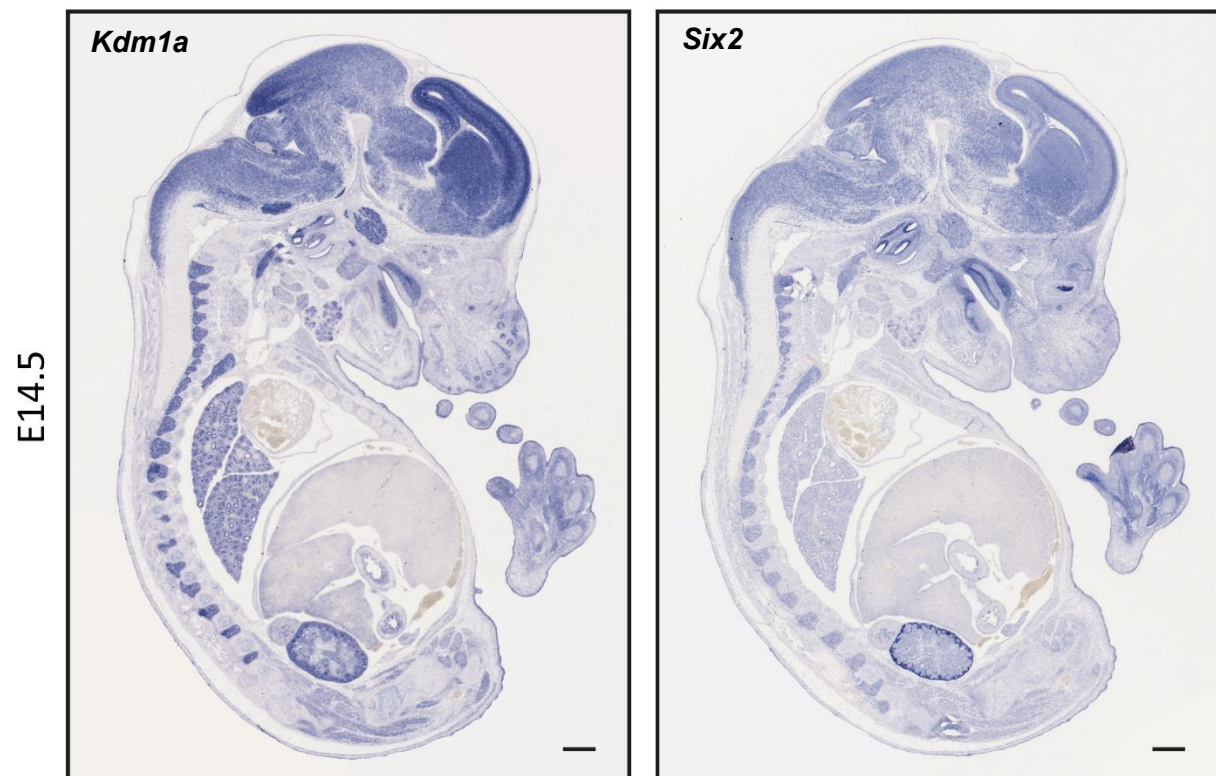

**Supplementary Figure 1. In situ hybridization for *Kdm1a* and *Six2* in E14.5 kidneys.** In situ hybridization on embryonic day 14.5 (E14.5) wild-type kidney sections detecting *Kdm1a* (left) and *Six2* (right) mRNA expression. Scale bar: 1 mm.

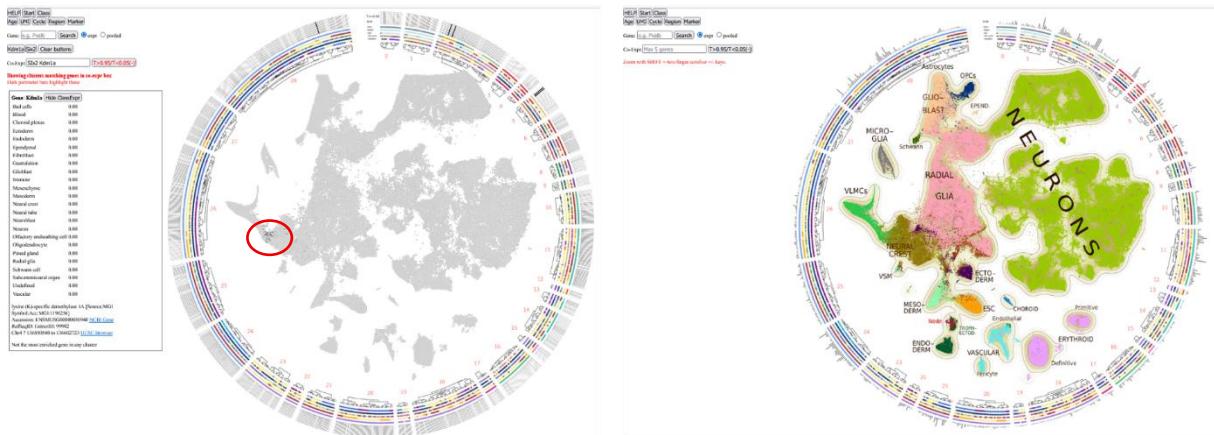

**Supplementary Figure 2. Overlapping expression of *Six2* and *Kdm1a* in the developing mouse brain.** At embryonic day 10.5 (E10.5), overlapping expression of *Six2* and *Kdm1a* in the developing mouse brain is restricted to neural crest–derived cells and vascular/leptomeningeal cells (VLMCs), based on data from the Mouse Brain Atlas (<http://mousebrain.org/wheel/>)<sup>4</sup>.

Six2.Cre; mT/mG

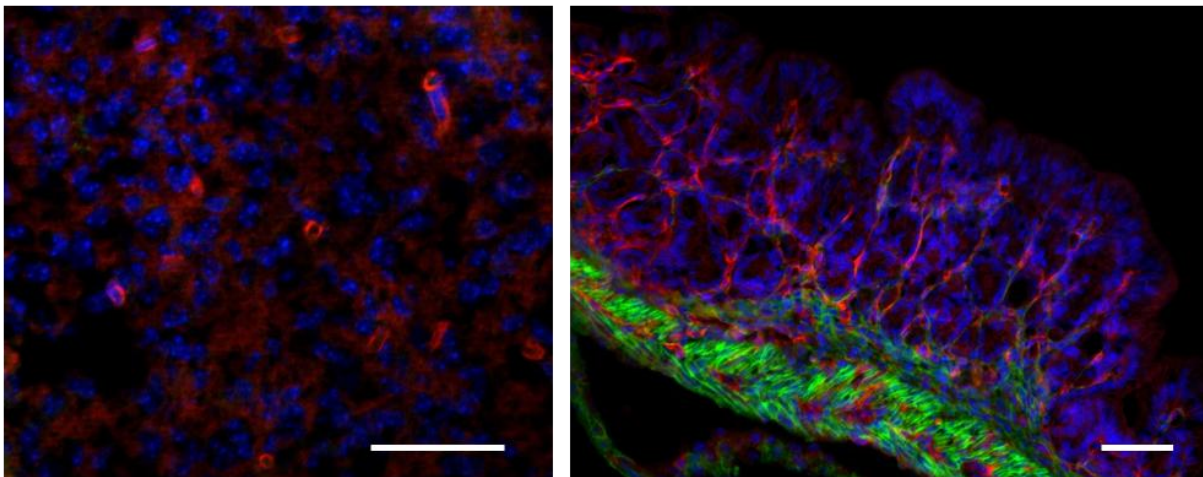

**Supplementary Figure3. Six2.Cre-driven reporter expression in non-renal tissues.** Tissue sections from postnatal day 0 (p0) Six2.Cre;mTomato/mEGFP reporter mice stained with DAPI. Cre activity is indicated by mEGFP expression (green), while mTomato (red) marks non-recombined cells. No Cre activity is detected in the cerebral cortex (left), whereas mEGFP-positive cells are observed in the stomach (right). Scale bar: 50  $\mu$ m.

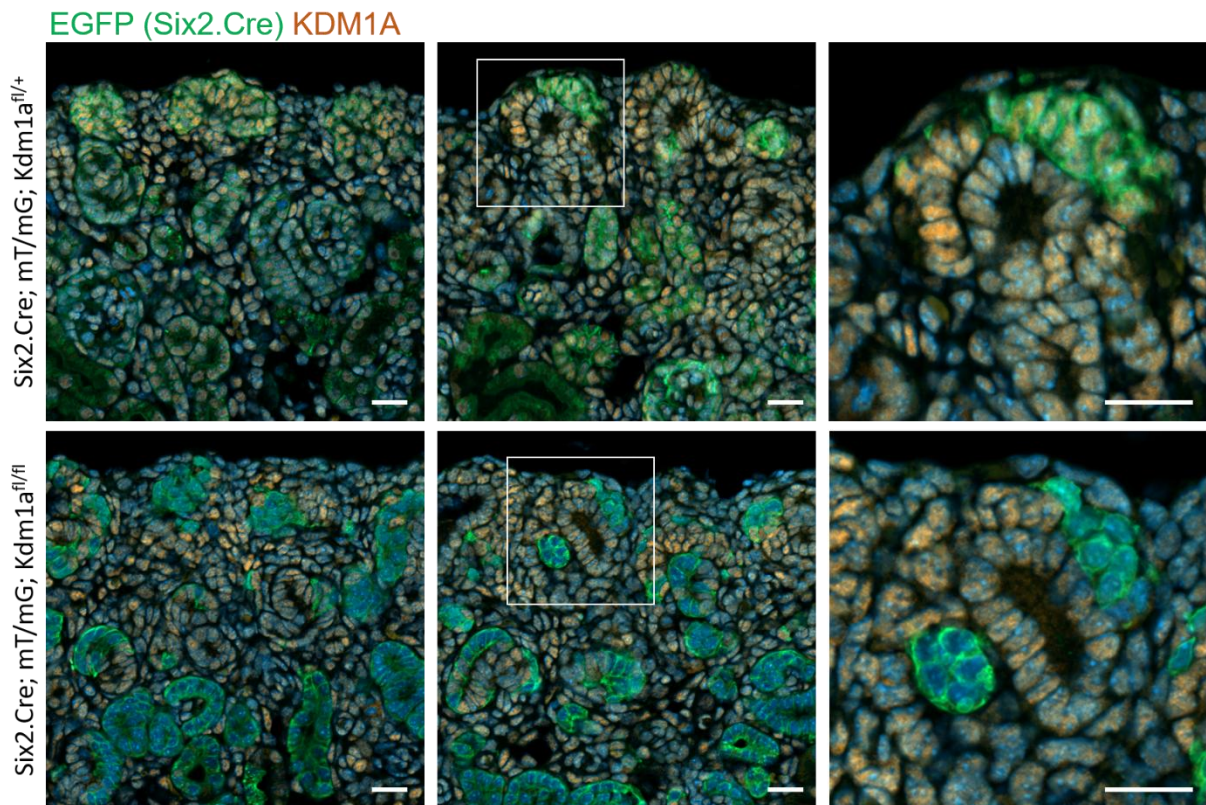

**Supplementary Figure 4. Validation of *Kdm1a* knockout in p0 kidneys.** Immunofluorescence staining for KDM1A (orange) and EGFP (green) in postnatal day 0 (p0) kidneys from heterozygous (upper panel) and knockout (lower panel) mice. In knockout kidneys, KDM1A staining is absent in EGFP-positive cells, confirming successful gene deletion. Scale bars: 20  $\mu$ m.

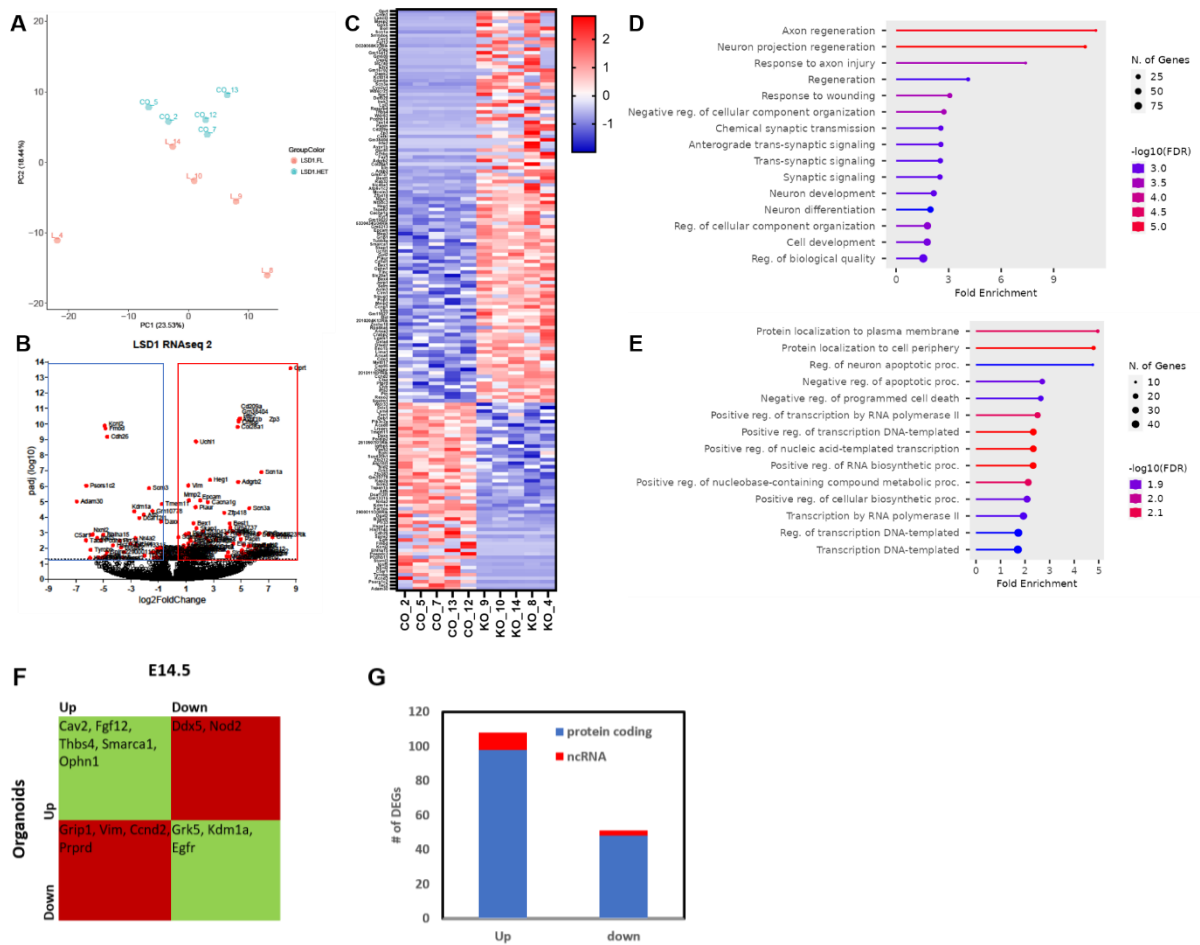

**Supplementary Figure 5. RNA-sequencing analysis of isolated cap mesenchyme at E14.5.** A) Principal component analysis shows clear differentiation between control (*Six2.Cre;Kdm1a<sup>fl/+</sup>* (heterozygous, LSD1\_HET)) and KO (*Six2.Cre Kdm1a<sup>fl/fl</sup>* (LSD1\_KO)) cells. B) Volcano shows distribution of differentially regulated genes. C) Heatmap of differentially regulated genes per sample. D and E) Shiny GO plot of top 15 GO Biological Processes from up and downregulated genes with a p-value <0.01. F) Overlap between differentially regulated genes in the RNA-sequencing from E14.5 cap mesenchyme and kidney organoids. G) Number of differentially regulated genes belonging to the non-coding RNA class.

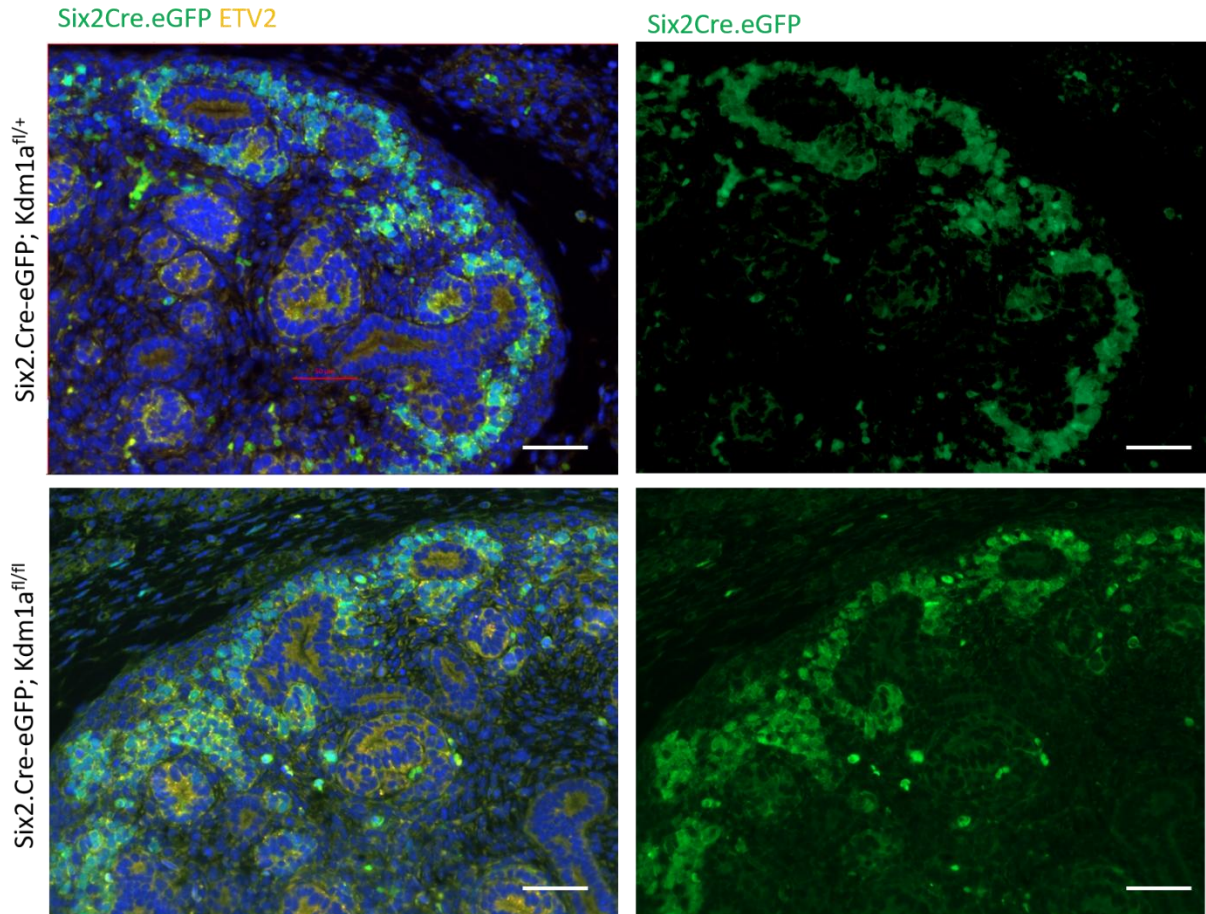

**Supplementary Figure 6. Nephron progenitor cells at E14.5 kidneys.** Immunofluorescence staining for ETV2 (orange) and endogenous Six2.Cre-eGFP (green) in embryonic day 14.5 (E14.5) kidneys from heterozygous (upper panel) and *Kdm1a* knockout (lower panel) mice. The amount of Six2.Cre-eGFP-positive nephron progenitor cells appear comparable between genotypes. Scale bars: 50  $\mu$ m. Blue: DAPI staining of nuclei.

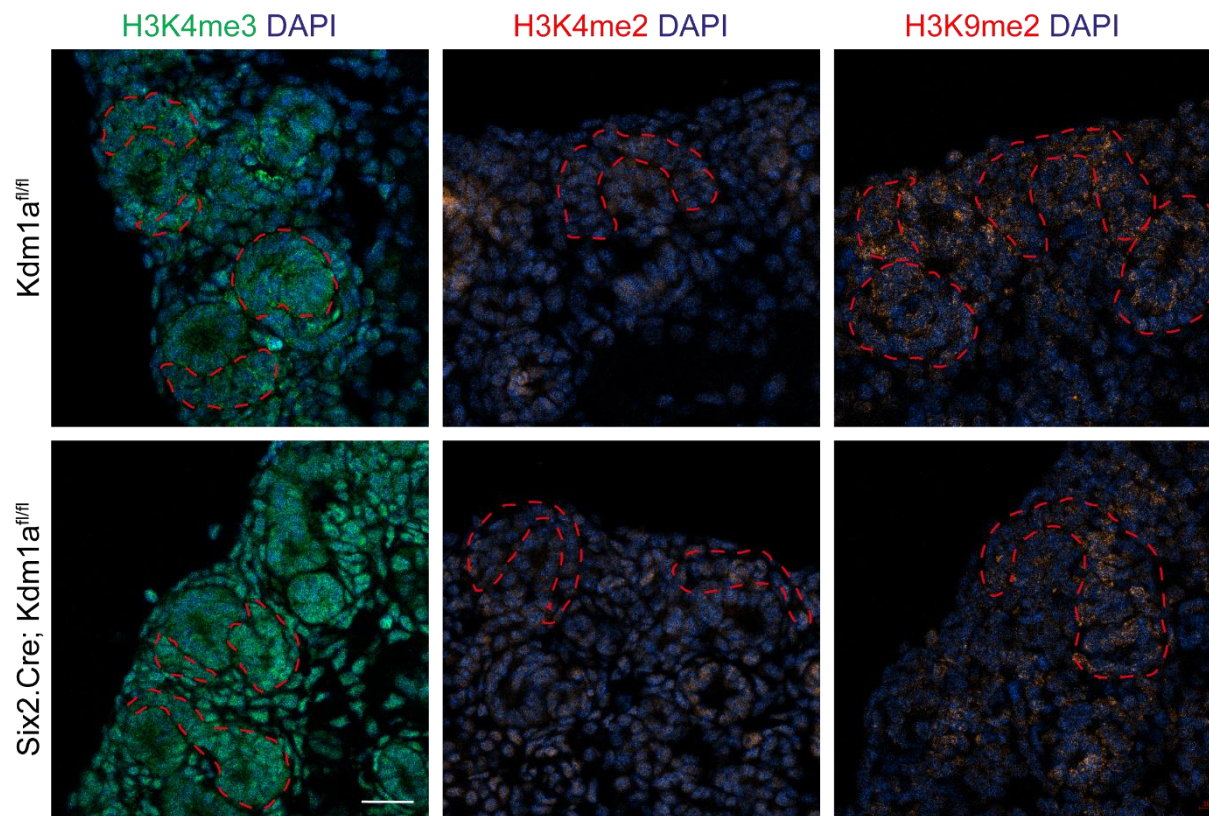

**Supplementary Figure 7. Histone modifications in p0 kidneys.** Immunofluorescence staining for histone marks H3K4me3 (green), H3K4me2 (red), and H3K9me2 (red) on kidney sections from postnatal day 0 (p0) wild-type (upper panels) and *Kdm1a* knockout (lower panels) mice. Red dotted lines outline the cap mesenchyme and budding nephrons. Scale bars: 20  $\mu$ m.

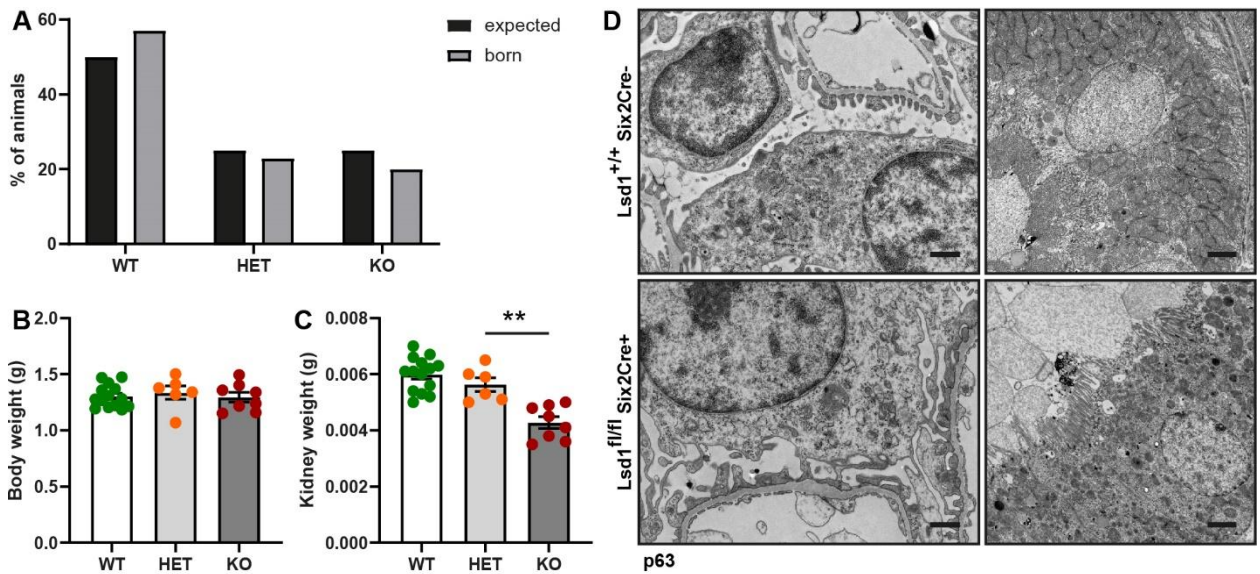

**Supplementary Figure 8: Genotype and phenotype of the p0 and p63 *Kdm1a* KO animals.** A) Genotypes of the pups from *Six2Cre*<sup>+/+</sup> *Kdm1a* fl/wt and *Six2Cre*<sup>-/-</sup> *Kdm1a* fl/fl breedings followed the expected Mendelian ratio (expected - light grey, born - dark grey; wt, n = 80; het, n = 32; ko, n = 28). B) Body weight of newborn wildtype, heterozygous and *Lsd1* knockout pups was the same. C) Kidney weight of newborn *Kdm1a* knockout animals was reduced compared to wildtype and heterozygous litter mates. \*\*, p=0.0012. D) Transmission electron microscopy of wildtype and *Kdm1a/Lsd1* KO kidneys at p63 shows foot process effacement and accumulation of cell debris in urinary space. Scale bars left panels, 750 nm, middle and right panels, 2  $\mu$ m.

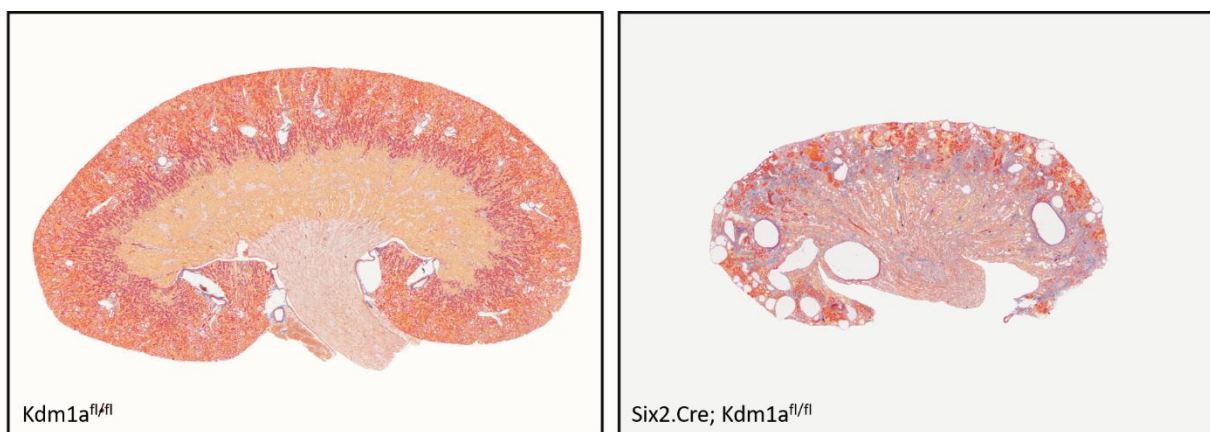

**Supplementary Figure 9. SFOG staining of whole kidney sections at postnatal day 63.** Whole kidney sections from wild-type (left panel) and *Kdm1a* knockout (right panel) mice were stained with SFOG (Sirius Red, Fast Green, Orange G) to assess tissue morphology and fibrosis.

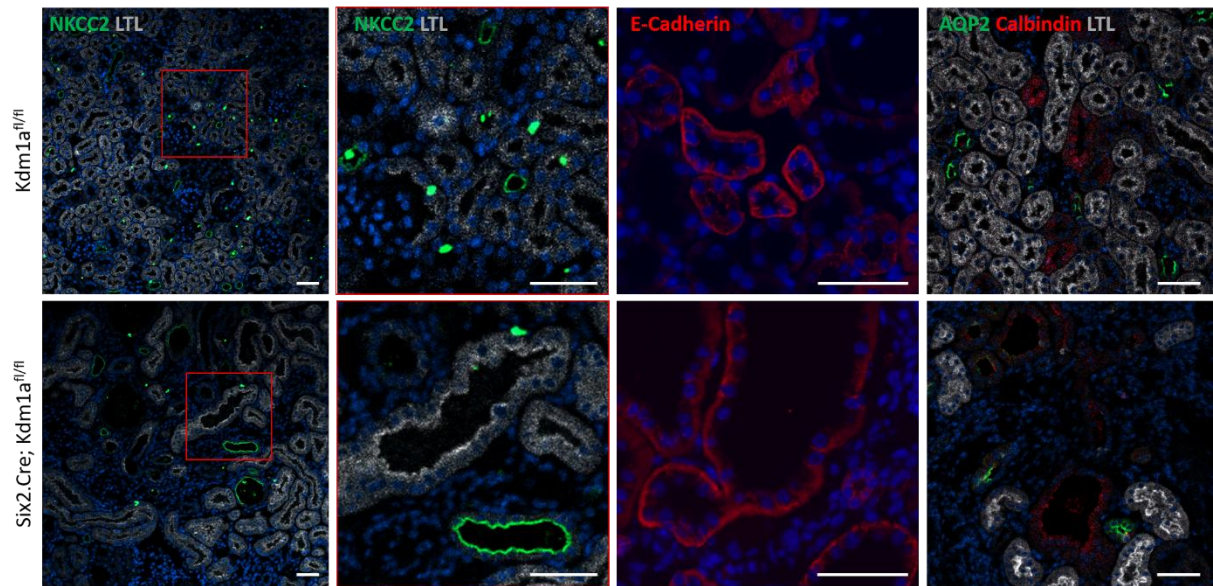

**Supplementary Figure 10. Cyst formation in distinct tubular segments of p63 kidneys.** Immunofluorescence staining for segment-specific tubular markers in postnatal day 63 (p63) kidney sections from wild-type (upper panels) and *Kdm1a* knockout (lower panels) mice. From left to right: proximal tubules (Lotus Tetragonolobus Lectin, LTL), thick ascending limb (NKCC2), distal tubules (E-cadherin), distal convoluted and connecting tubules (Calbindin), and collecting ducts (AQP2). Red squares indicate areas shown at higher magnification in adjacent panels. Scale bars: 20  $\mu\text{m}$ .

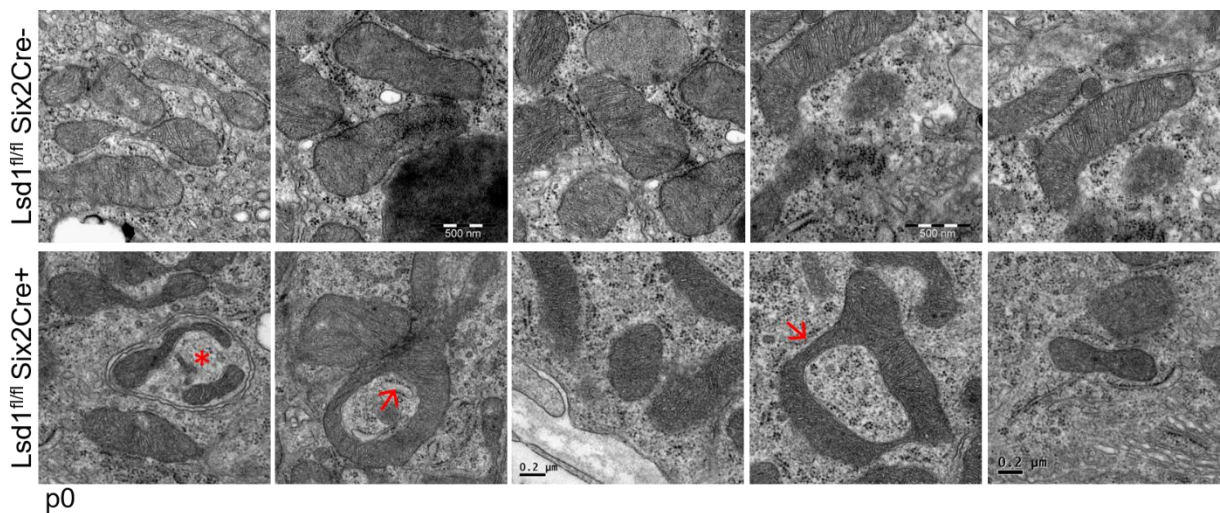

**Supplementary Figure 11: Loss of *Kdm1a* results in irregular mitochondria.** Transmission electron microscopy of wildtype (upper panel) and *Kdm1a* KO (lower panel) kidneys at p0 shows mitophagy (red asterisk) and mitochondrial fusion (red arrows) in the KO kidneys. Scale bars, upper panel, 500 nm, lower panel, 2  $\mu\text{m}$ .

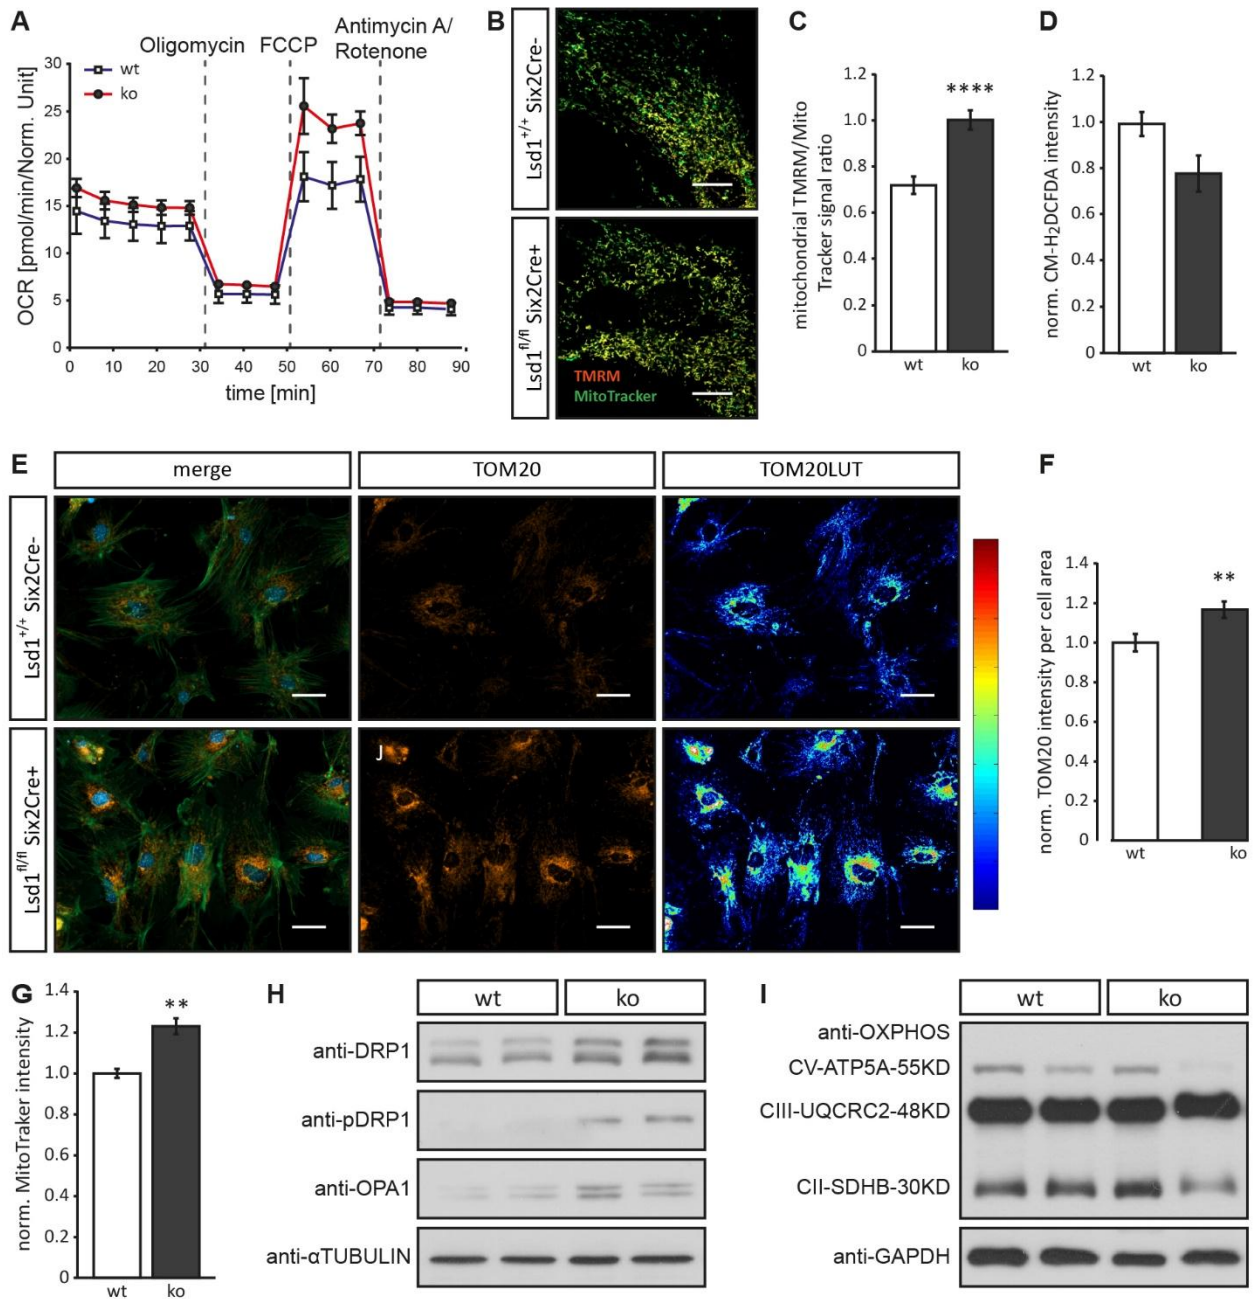

**Supplementary Figure 12: Loss of *Kdm1a* leads to altered mitochondrial function.** A) Oxygen consumption rate (OCR) determined by Seahorse Extracellular Flux Analyzer exhibited higher FCCP response of primary renal cells *Kdm1a* KO compared to wildtype cells. B) Immunofluorescence analysis of mitochondrial membrane potential using tetramethylrhodamine methyl ester (TMRM; red) and MitoTracker (green). Scale bars, 5  $\mu$ m. C) Quantification of mitochondrial TMRM/MitoTracker signal ratio shows significant increase in mitochondrial membrane potential (normalized to mean KO signal ratio) (ctl, n = 21, N = 2; ko, n = 20, N = 2). D) The oxidative stress indicator CM-H<sub>2</sub>DCFDA intensity shows no increase of ROS by loss of LSD1 (normalized to mean WT intensity) (ctl, n = 6, N = 2; ko, n = 6, N = 2). E) Staining of mitochondrial membrane marker TOM20 (orange) (normalized to mean WT intensity per cell area) (ctl, n = 55, N = 2; ko, n = 51, N = 2) showed significant increase of normalized TOM20 intensity per cell area. Scale bars, 10  $\mu$ m. F) Quantification of TOM20 intensity. G) Quantification of MitoTracker intensity also reveals very significant increase in mitochondrial signal

(normalized to mean WT intensity) (ctl, n = 6, n = 2; ko, n = 6, N = 2). H) Western blot analysis shows enrichment of mitochondrial-specific markers DRP1, pDRP1 and OPA1 in KO (n=2). I) Western blot analysis of OXPHOS-proteins CV-ATP5A, CIII-UQCRC2 and CII-SDHB reveals no alteration in KO (n=2).

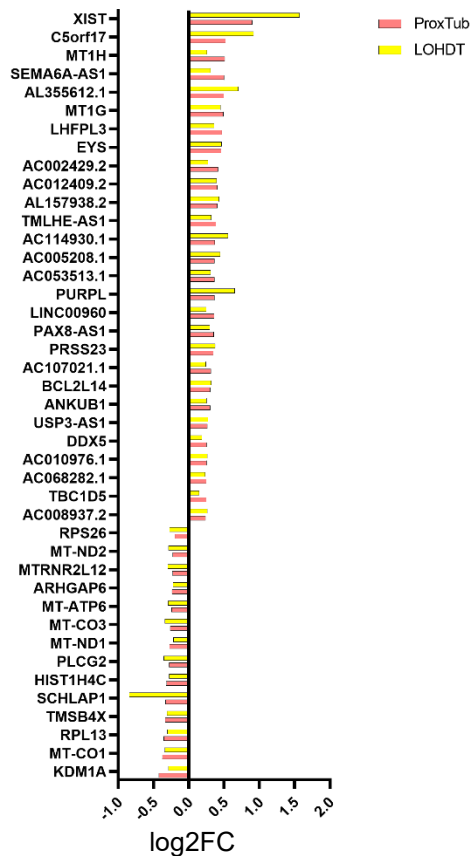

**Supplementary Figure 13. Genes differentially expressed in both proximal tubules and loop of Henle/distal tubules.** Log2 fold change shows upregulation of genes, many of them non-protein coding, such as XIST, PURPL, antisense (AS) genes and noncoding RNAs. Downregulated genes contain mitochondrial genes, PLCG2, TMSB4X and ARHGAP6.

| A      | WP Ciliary La | Offtarget | EC         | MS1        | MS2        | NPClike    | NPC        | RV         | POD        | matPOD     | PT         | LOHDT | CD   | UB         |
|--------|---------------|-----------|------------|------------|------------|------------|------------|------------|------------|------------|------------|-------|------|------------|
| H3F3A  | n.s.          | n.s.      | -0.1794186 | n.s.       | n.s.       | n.s.       | n.s.       | n.s.       | -0.1877122 | -0.283857  | n.s.       | n.s.  | n.s. | n.s.       |
| TFAP2B | 0.58168985    | n.s.      | n.s.       | n.s.       | n.s.       | n.s.       | n.s.       | n.s.       | n.s.       | n.s.       | n.s.       | n.s.  | n.s. | n.s.       |
| CEP170 | n.s.          | n.s.      | -0.1589923 | n.s.       | n.s.       | n.s.       | n.s.       | n.s.       | n.s.       | n.s.       | n.s.       | n.s.  | n.s. | n.s.       |
| CTBP2  | n.s.          | n.s.      | n.s.       | -0.2217731 | n.s.       | n.s.       | n.s.       | n.s.       | n.s.       | n.s.       | n.s.       | n.s.  | n.s. | n.s.       |
| CREBBP | n.s.          | n.s.      | -0.1315911 | n.s.       | n.s.       | n.s.       | n.s.       | -0.2709795 | -0.1573061 | n.s.       | n.s.       | n.s.  | n.s. | n.s.       |
| CAMK2A | n.s.          | n.s.      | n.s.       | n.s.       | n.s.       | n.s.       | n.s.       | n.s.       | -0.1402555 | n.s.       | n.s.       | n.s.  | n.s. | n.s.       |
| ACSL3  | n.s.          | n.s.      | n.s.       | n.s.       | n.s.       | n.s.       | n.s.       | n.s.       | -0.141377  | n.s.       | n.s.       | n.s.  | n.s. | n.s.       |
| EXOC6B | n.s.          | n.s.      | n.s.       | n.s.       | n.s.       | n.s.       | n.s.       | n.s.       | -0.1403092 | n.s.       | n.s.       | n.s.  | n.s. | n.s.       |
| EXOC6  | n.s.          | n.s.      | n.s.       | -0.2544213 | n.s.       | n.s.       | n.s.       | n.s.       | n.s.       | n.s.       | n.s.       | n.s.  | n.s. | n.s.       |
| VIM    | n.s.          | n.s.      | n.s.       | n.s.       | n.s.       | n.s.       | n.s.       | n.s.       | -0.179748  | n.s.       | n.s.       | n.s.  | n.s. | n.s.       |
| WDR26  | n.s.          | n.s.      | -0.1326139 | n.s.       | n.s.       | n.s.       | n.s.       | n.s.       | n.s.       | n.s.       | n.s.       | n.s.  | n.s. | n.s.       |
| RMND5A | n.s.          | n.s.      | n.s.       | -0.2146921 | n.s.       | n.s.       | n.s.       | n.s.       | n.s.       | n.s.       | n.s.       | n.s.  | n.s. | n.s.       |
| DDX5   | 0.48991855    | n.s.      | n.s.       | 0.20717671 | 0.21983958 | 0.27375112 | 0.23945141 | 0.30356923 | 0.30686224 | 0.25652342 | 0.19182801 | n.s.  | n.s. | 0.26572105 |
| MYL6   | n.s.          | n.s.      | n.s.       | n.s.       | n.s.       | n.s.       | n.s.       | n.s.       | -0.1287928 | n.s.       | n.s.       | n.s.  | n.s. | n.s.       |
| IQGAP2 | n.s.          | n.s.      | n.s.       | n.s.       | n.s.       | n.s.       | n.s.       | n.s.       | -0.2288333 | n.s.       | n.s.       | n.s.  | n.s. | n.s.       |
| SMC4   | n.s.          | n.s.      | n.s.       | n.s.       | n.s.       | n.s.       | n.s.       | n.s.       | -0.2180715 | n.s.       | n.s.       | n.s.  | n.s. | n.s.       |

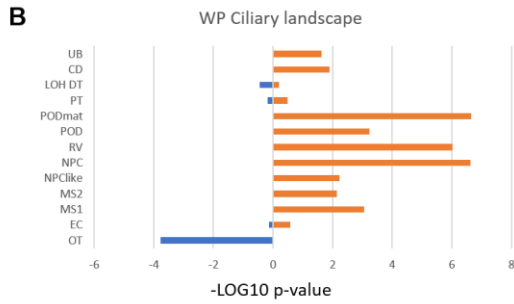

**C**

| Ciliary genes      | Offtarget | MS1   | MS2  | NPClike | NPC  | RV   | POD   | matPOD | PT    | LOH DT | CD     | UB   |
|--------------------|-----------|-------|------|---------|------|------|-------|--------|-------|--------|--------|------|
| PKD1/PKD2          | n.s.      | n.s.  | n.s. | n.s.    | n.s. | n.s. | n.s.  | n.s.   | n.s.  | n.s.   | n.s.   | n.s. |
| PKHD1              | n.s.      | n.s.  | n.s. | n.s.    | n.s. | n.s. | n.s.  | n.s.   | 0.342 | n.s.   | 0.3999 | n.s. |
| GLIS2              | n.s.      | n.s.  | n.s. | n.s.    | n.s. | n.s. | n.s.  | n.s.   | n.s.  | n.s.   | n.s.   | n.s. |
| GLIS3              | n.s.      | 0.226 | n.s. | n.s.    | n.s. | n.s. | n.s.  | n.s.   | n.s.  | n.s.   | n.s.   | n.s. |
| CC2D2A             | n.s.      | n.s.  | n.s. | n.s.    | n.s. | n.s. | 0.146 | n.s.   | n.s.  | n.s.   | n.s.   | n.s. |
| VHL                | n.s.      | n.s.  | n.s. | n.s.    | n.s. | n.s. | n.s.  | n.s.   | n.s.  | n.s.   | n.s.   | n.s. |
| NPHP1-9            | n.s.      | n.s.  | n.s. | n.s.    | n.s. | n.s. | n.s.  | n.s.   | n.s.  | n.s.   | n.s.   | n.s. |
| NEK1               | n.s.      | n.s.  | n.s. | n.s.    | n.s. | n.s. | n.s.  | n.s.   | n.s.  | n.s.   | n.s.   | n.s. |
| BBS3-14            | n.s.      | n.s.  | n.s. | n.s.    | n.s. | n.s. | n.s.  | n.s.   | n.s.  | n.s.   | n.s.   | n.s. |
| MKS1/3             | n.s.      | n.s.  | n.s. | n.s.    | n.s. | n.s. | n.s.  | n.s.   | n.s.  | n.s.   | n.s.   | n.s. |
| B9D1/2             | n.s.      | n.s.  | n.s. | n.s.    | n.s. | n.s. | n.s.  | n.s.   | n.s.  | n.s.   | n.s.   | n.s. |
| TMEM67/107/216/231 | n.s.      | n.s.  | n.s. | n.s.    | n.s. | n.s. | n.s.  | n.s.   | n.s.  | n.s.   | n.s.   | n.s. |

**Supplementary Figure 14. Ciliary gene dysregulation upon *KDM1A* knockout in renal organoids.**

A) Overlap of differentially expressed genes with the WikiPathways *Ciliary Landscape* gene set. B) Gene set enrichment analysis (GSEA) of the *Ciliary Landscape* pathway across individual cell populations. C) Additional cilia-associated genes and genes previously linked to cystic phenotypes.

**Supplementary Tables:**

**Supplementary Table 2: Primers used for mouse genotyping analysis as well as generation of *in situ* probes.**

| Primer                        | Sequence                                      |
|-------------------------------|-----------------------------------------------|
| Cre Forward                   | 5' GCA TTA CCG GTC GAT GCA ACG AGT GAT GAG 3' |
| Cre Reverse                   | 5' GAG TGA ACG AAC CTG GTC GAA ATC AGT GCG 3' |
| <i>Fabpi</i> -200 Forward     | 5' TGG ACA GGA CTG GAC CTC TGC TTT CCT AGA 3' |
| <i>Fabpi</i> -200 Reverse     | 5' TAG AGC TTT GCC ACA TCA CAG GTC ATT CAG 3' |
| <i>Kdm1a</i> knockout Forward | 5' CCT ACA CTG TGC CAG GCT GC 3'              |
| <i>Kdm1a</i> knockout Reverse | 5' GCA GGC GGT TTG AAA TGT ATT C 3'           |
| <i>Kdm1a</i> knockin Forward  | 5' CCA GCT GCT TGT TGG TGC 3'                 |
| <i>Kdm1a</i> knockin Reverse  | 5' TGG AGT GAA GTG GTT ACC TGC 3'             |
| <i>Sry</i> Forward            | 5' TTG TCT AGA GAG CAT GGA GGG CCA TGT CAA 3' |
| <i>Sry</i> Reverse            | 5' CCA CTC CTC TGT GAC ACT TTA GCC CTC CGA 3' |
| <i>Tomato/EGFP</i> Forward    | 5' CTC TGC TGC CTC CTG GCT TCT 3'             |

|                                  |                                                            |
|----------------------------------|------------------------------------------------------------|
| <i>Tomato/EGFP</i> Reverse (wt)  | 5' CGA GGC GGA TCA CAA GCA ATA 3'                          |
| <i>Tomato/EGFP</i> Reverse (mut) | 5' TCA ATG GGC GGG GGT GCT T 3'                            |
| <i>Kdm1a</i> in-situ Forward     | 5' cgc ggg ACG CGT GCCCTGGTAGCAGGAGAAG 3'                  |
| <i>Kdm1a</i> in-situ Reverse     | 5' cgc ggg GCG GCC GCC AAGTTGCTGTCAGCCAAAGG 3'             |
| <i>Six2</i> in-situ Forward      | 5' cgc ggg ACG CGT CGG ACC CAC TGC AGC ATC ACC 3'          |
| <i>Six2</i> in-situ Reverse      | 5' cgc ggg GCG GCC GCC TTC AGG TGC TTC TGG GGT<br>GCA G 3' |

**Supplementary Table 3: Antibodies used for immunofluorescence and western blot analysis.**

| Primary antibodies                          | Dilution | Condition | Company                      |
|---------------------------------------------|----------|-----------|------------------------------|
| goat anti-Megalin (P-20, sc-16478)          | 1:100    | IF, pH9   | Santa Cruz Biotechnology     |
| rabbit anti-LSD1 (#20752)                   | 1:100    | IF, pH9   | AG Schüle, Freiburg, Germany |
| mouse anti-GFP (B-2, sc-9996)               | 1:100    | IF, pH9   | Santa Cruz Biotechnology     |
| rabbit anti-tom20 (sc-11415)                | 1:100    | IF, pH9   | Santa Cruz Biotechnology     |
| guinea-pig anti-Nephrin (GP-N2)             | 1:200    | IF, pH9   | Progen                       |
| Lotus tetragonobulus lectin (B-1325)        | 1:100    | IF, pH9   | Vector Laboratories          |
| rabbit anti-KDM1A (#3544)                   | 1:1000   | WB        | AG Schüle, Freiburg, Germany |
| mouse anti-GAPDH (6C5, ab8245)              | 1:5000   | WB        | Abcam                        |
| rabbit anti-DRP1 (5391S)                    | 1:1000   | WB        | Cell Signaling Technology    |
| rabbit anti-pDRP1 (3455)                    | 1:1000   | WB        | Cell Signaling Technology    |
| mouse anti-OPA1 (612607)                    |          | WB        | BD Biosciences               |
| mouse anti-OXPHOS (ab110413)                | 1:3000   | WB        | Abcam                        |
| mouse anti- $\alpha$ Tubulin (T 9026)       | 1:10000  | WB        | Sigma-Aldrich GmbH           |
| mouse anti-H3K4me2 (39679, Clone MABI 0303) | 1:100    | IF, pH9   | Active Motif                 |
| rabbit anti-H3K4me3 (G.532.8)               | 1:100    | IF, pH9   | Thermo Scientific            |
| mouse anti-H3K9me2 (1220)                   | 1:100    | IF, pH9   | Abcam                        |

|                                                   |                 |                  |                           |
|---------------------------------------------------|-----------------|------------------|---------------------------|
| E-Cadherin Monoclonal Antibody (4A2C7)            | 1:100           | IF, pH9          | Life technologies         |
| mouse anti-Calbindin (D-28k)                      | 1:100           | IF, pH9          | StressMarq Biosciences    |
| anti-AQP2 (AQP-002)                               | 1:100           | IF, pH9          | Alomone Labs              |
| anti-NKCC2 (SPC-401)                              | 1:100           | IF, pH9          | StressMarq Biosciences    |
| rabbit anti-ETV2 (ab181847)                       | 1:100           | IF, pH9          | Abcam                     |
| <b>Secondary antibodies/fluorescent compounds</b> | <b>Dilution</b> | <b>Condition</b> | <b>Company</b>            |
| Alexa Fluor 488 donkey anti-goat IgG              | 1:500           | IF, pH9          | Thermo Fisher Scientific  |
| Alexa Fluor 488 donkey anti-mouse IgG             | 1:500           | IF, pH9          | Thermo Fisher Scientific  |
| Alexa Fluor 555 donkey anti-rabbit IgG            | 1:500           | IF, pH9          | Thermo Fisher Scientific  |
| Alexa Fluor 488 Phalloidin                        | 1:1000          | IF, pH9          | Thermo Fisher Scientific  |
| Hoechst                                           | 1:5000          | IF, pH9          | Molecular Probes          |
| DAPI                                              | 1:5000          | IF, pH9          | Sigma Aldrich             |
| goat anti-rabbit IgG-HRP (#7074S)                 | 1:3000          | WB               | Cell Signaling Technology |
| goat anti-mouse IgG-HRP (#P0447)                  | 1:10000         | WB               | Dako                      |

**Supplementary Table 4: Primers used for the generation of CRISPR/Cas9 KO iPSCs.**

| <b>Oligo</b>              | <b>Forward</b>          | <b>Reverse</b>          |
|---------------------------|-------------------------|-------------------------|
| Guide RNA                 | GGCAAGGCTTTTCGGACCCACGG | GGCGGTGTCGTTTGAGGGAAGGG |
| Genotyping Exon1_external | AGCTACACGTTCTTTGCTGC    | GTCAACACCGGCAAAGACTT    |
| Genotyping Exon1_internal | TTATCTGGGAAGAAGGCGGC    | CCGGAGTCTCTGCTATTCCA    |
| Genotyping Exon1_2        | TGGAATAGCAGAGACTCCGG    | CACGTCAGGGAGCCATTTTC    |

|                       |                      |                       |
|-----------------------|----------------------|-----------------------|
| Genotyping<br>Exon1_3 | AGCTACACGTTCTTTGCTGC | GCCGCCTTCTTCCCAGATAA  |
| Sequencing primer     | GCATGCAAACCCGAAAGTCC |                       |
| Offtarget 1           | CCATAGCTCCAGACTACGCA | GGTATTCCCCTCCAACCCAG  |
| Offtarget 2           | GGGACTATGGCTAAGGGGTC | TGTACCGAAAGCACAGGGAT  |
| Offtarget 3           | CACCCTGTCCATGAAGAGGT | GCACTTCAGCTTCTCAAGG   |
| Offtarget 4           | AGGAGAAAGTCGTTGCAGGA | CTCCGAGATTTGTCCCTGGT  |
| Offtarget 5           | AACAGGAATGAGAGGCCACA | CAGGCAAGAAAGGAGCGTTT  |
| Offtarget 6           | AGTCCTTTCCAGCCTTACCG | CACCCTTTTCTTCGCTTGCT  |
| Offtarget 7           | CCTGACACTGAGCACGTTTC | TCCCAGCTGCAATCTCTGAA  |
| Offtarget 8           | TGATGTGGGAGCATGGAAGT | TGAGGGTGTTTCATGCCTGAT |
| Offtarget 9           | TGGGGATGGAGATGGAGTTG | GAACAAGGCAGGAAAGTGGG  |
| Offtarget 10          | AGAAGGAACCTGGAGAGCAG | AGGAAGAGAGCCAAGGACAC  |

### Supplementary References

1. Bolger AM, Lohse M, Usadel B. Trimmomatic: a flexible trimmer for Illumina sequence data. *Bioinformatics*. 2014 Aug 1;30(15):2114-20. doi: 10.1093/bioinformatics/btu170. Epub 2014 Apr 1. PMID: 24695404; PMCID: PMC4103590.
2. Dobin A, Davis CA, Schlesinger F, Drenkow J, Zaleski C, Jha S, Batut P, Chaisson M, Gingeras TR. STAR: ultrafast universal RNA-seq aligner. *Bioinformatics*. 2013 Jan 1;29(1):15-21. doi: 10.1093/bioinformatics/bts635. Epub 2012 Oct 25. PMID: 23104886; PMCID: PMC3530905.
3. Love MI, Huber W, Anders S. Moderated estimation of fold change and dispersion for RNA-seq data with DESeq2. *Genome Biol*. 2014;15(12):550. doi: 10.1186/s13059-014-0550-8. PMID: 25516281; PMCID: PMC4302049.
4. Zeisel A, Hochgerner H, Lönnerberg P, Johnsson A, Memic F, van der Zwan J, Häring M, Braun E, Borm LE, La Manno G, Codeluppi S, Furlan A, Lee K, Skene N, Harris KD, Hjerling-Leffler J, Arenas E, Ernfors P, Marklund U, Linnarsson S. Molecular Architecture of the Mouse Nervous System. *Cell*. 2018 Aug 9;174(4):999-1014.e22. doi: 10.1016/j.cell.2018.06.021. PMID: 30096314; PMCID: PMC6086934.
