# Supplementary material
Source: JCI journal article supplement (doi:10.1172/jci190283)
Supplement: sd2 [file 2]

Figure 1F

Anti-KDM1A

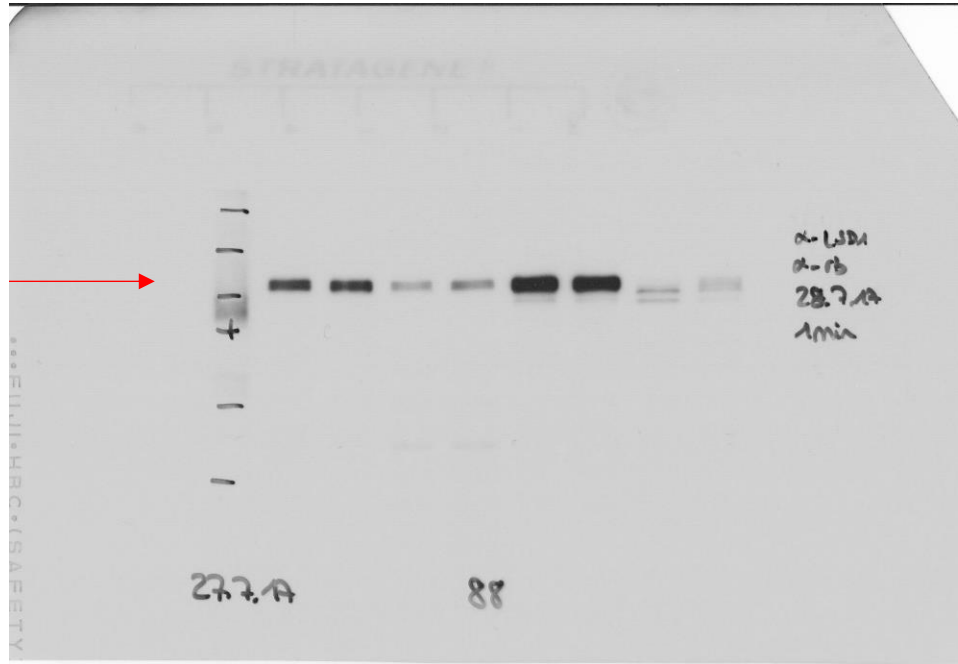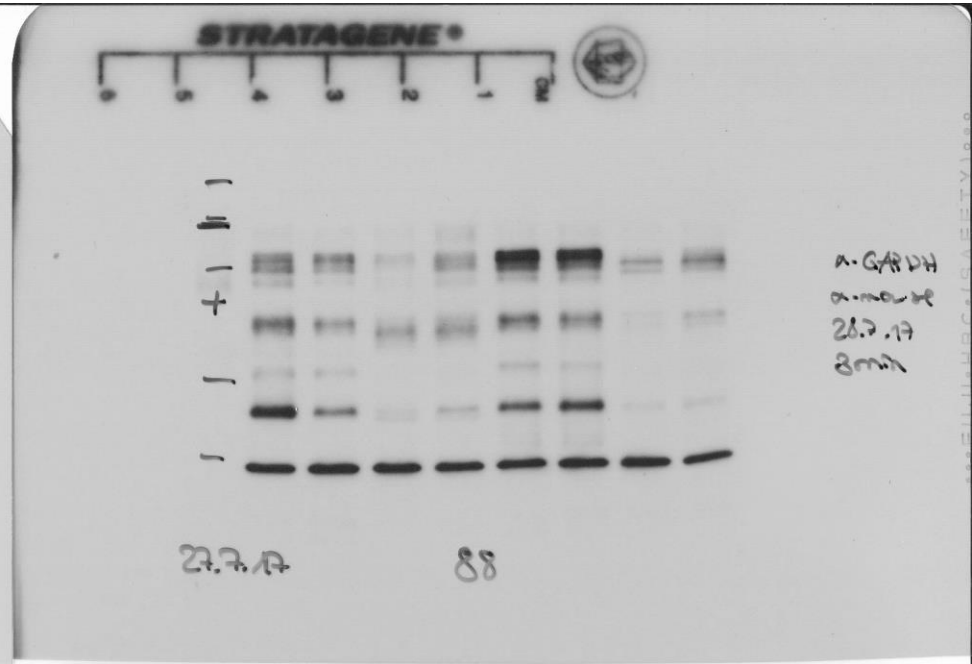

Anti-GAPDH

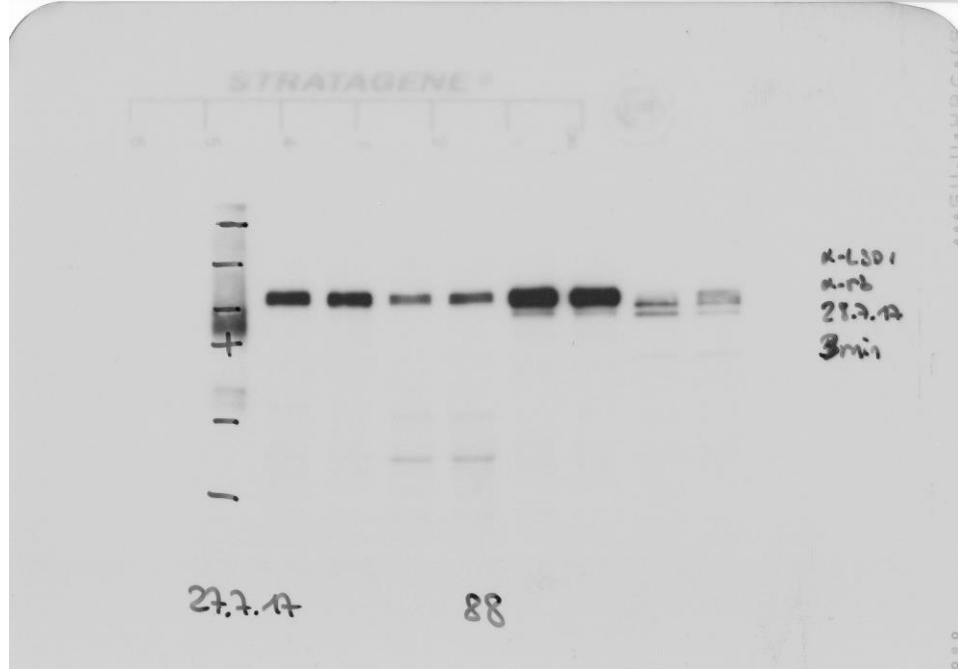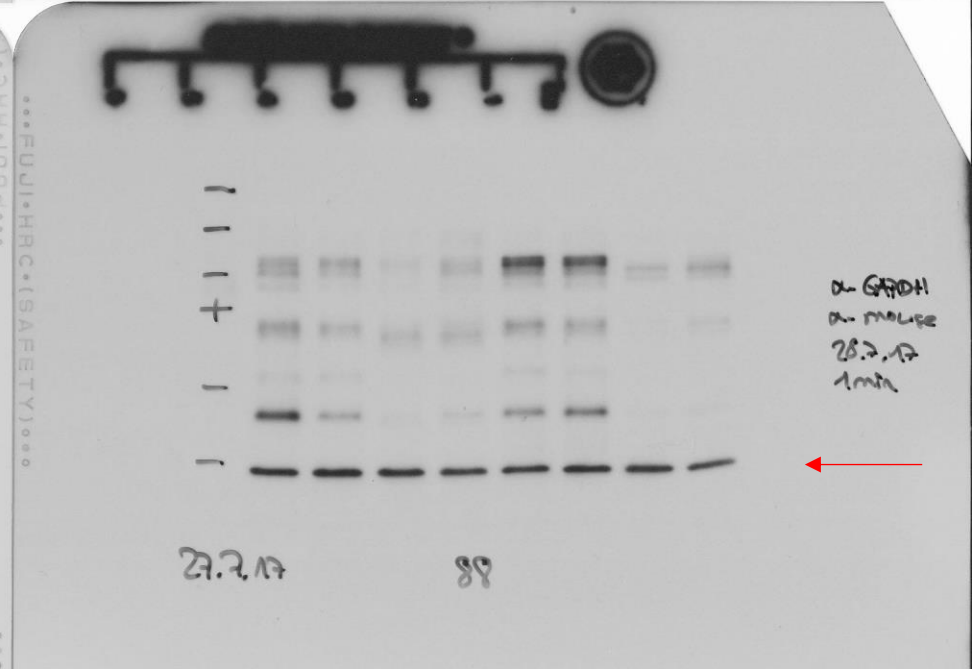

**Figure 6C**

Celllysate: buffer RIPA

Anti-KDM1A

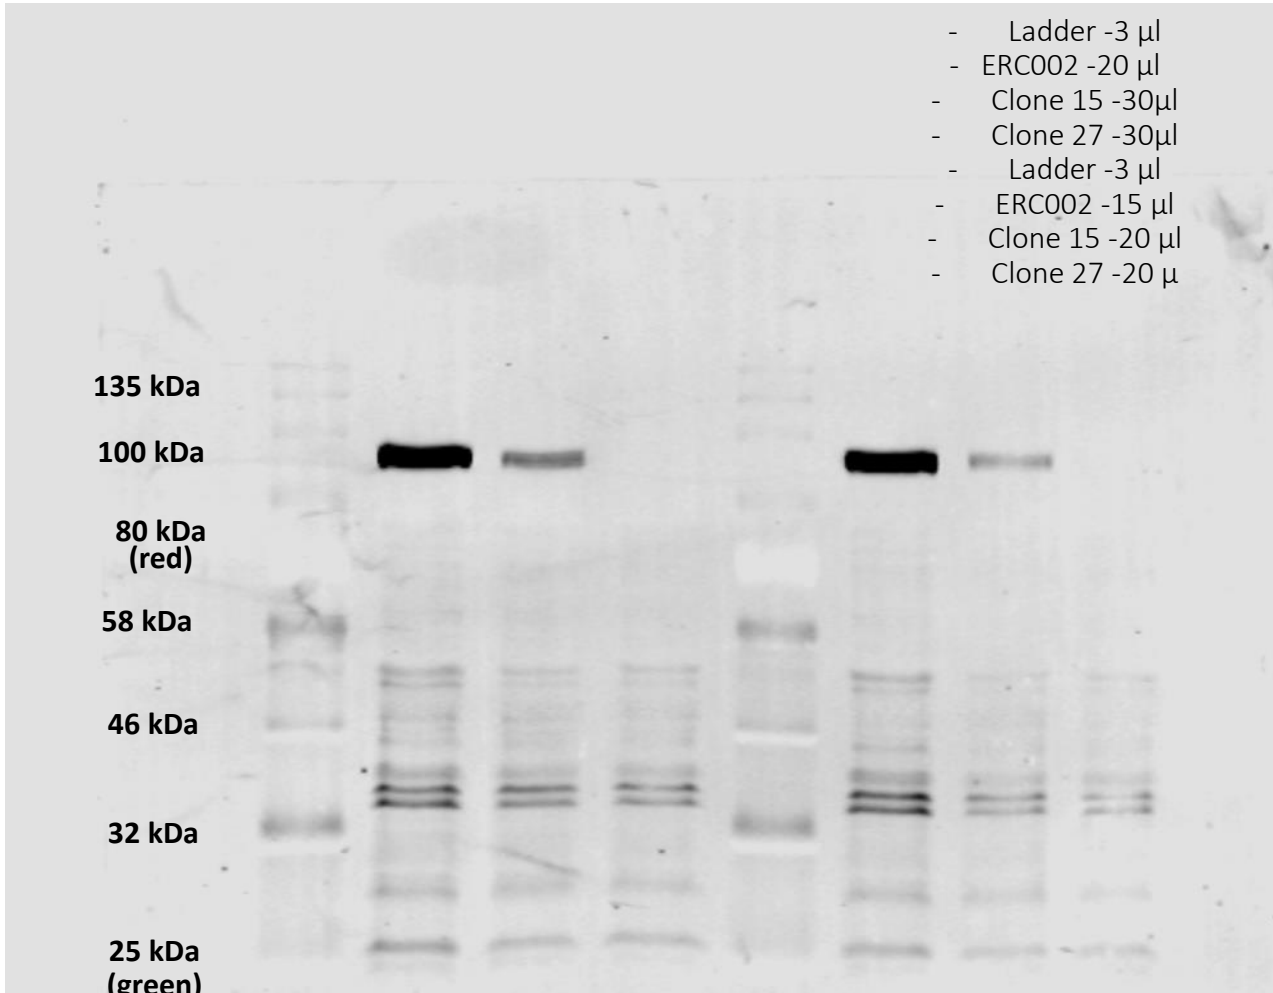

Exposure:  
- 800nm, lowest quality,  
f=0.0mm, 169μm

Anti-beta actin

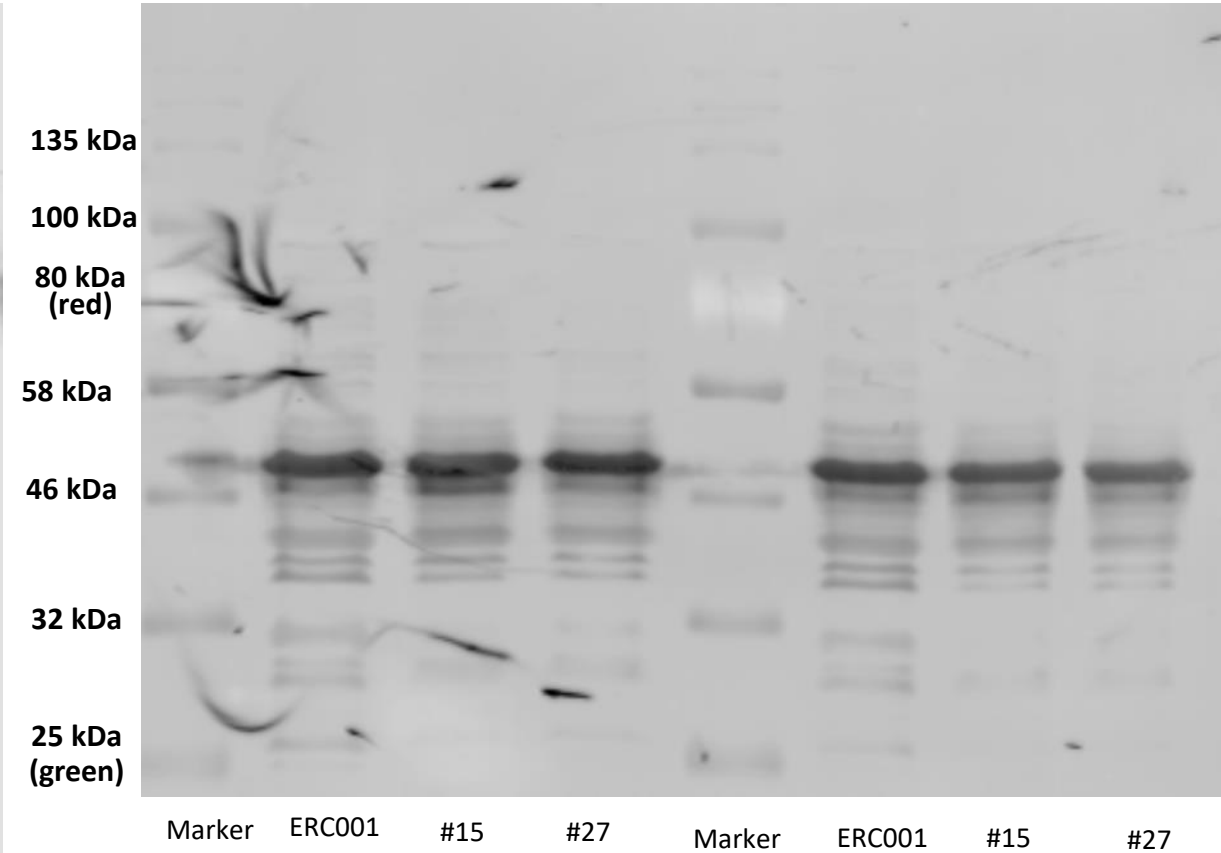

Exposure:  
- 700nm, lowest quality,  
f=0.0mm, 169μm
